# Supplementary material for: Testosterone for Low Libido in Postmenopausal Women Not Taking Estrogen
Source: Atypon-hosted journal article supplement (doi:10.1056/nejmoa0707302), 2008-11-05
Supplement: nejm_davis_2005sa1.pdf [file nejm_davis_2005sa1.pdf]

## Supplementary Appendix

This appendix has been provided by the authors to give readers additional information about their work.

Supplement to: Davis SR, Moreau M, Kroll R, et al. Testosterone for low libido in postmenopausal women not taking estrogen. *N Engl J Med* 2008;359:2005-17.

| <b>Web Table 1. Mean blood laboratory parameters at baseline and mean change from baseline at week 52</b> |                          |                             |                             |
|-----------------------------------------------------------------------------------------------------------|--------------------------|-----------------------------|-----------------------------|
| <b>Blood laboratory parameter (units)</b>                                                                 | <b>Placebo<br/>N=277</b> | <b>TTS 150mcg<br/>N=267</b> | <b>TTS 300mcg<br/>N=267</b> |
| <b>Total Cholesterol (mg/dL)</b>                                                                          |                          |                             |                             |
| Baseline                                                                                                  | 227.5                    | 229.5                       | 227.5                       |
| Change from Baseline                                                                                      | -7.6                     | -8.8                        | -13.4                       |
| % Markedly Abnormal High                                                                                  | 1.2%                     | 0.9%                        | 0.0%                        |
| <b>HDL-Cholesterol (mg/dL)</b>                                                                            |                          |                             |                             |
| Baseline                                                                                                  | 71.0                     | 72.0                        | 69.5                        |
| Change from Baseline                                                                                      | 0.9                      | -1.9                        | -2.2                        |
| % Markedly Abnormal Low                                                                                   | 0.0%                     | 0.0%                        | 0.8%                        |
| <b>LDL-Cholesterol (mg/dL)</b>                                                                            |                          |                             |                             |
| Baseline                                                                                                  | 134.5                    | 135.1                       | 134.9                       |
| Change from Baseline                                                                                      | -8.1                     | -7.9                        | -9.9                        |
| % Markedly Abnormal High                                                                                  | 3.2%                     | 3.0%                        | 1.3%                        |
| <b>Triglycerides (mg/dL)</b>                                                                              |                          |                             |                             |
| Baseline                                                                                                  | 110.2                    | 111.2                       | 115.6                       |
| Change from Baseline                                                                                      | -0.9                     | 7.0                         | -2.1                        |
| % Markedly Abnormal High                                                                                  | 1.6%                     | 5.6%                        | 2.5%                        |
| <b>Glucose (mg/dL)</b>                                                                                    |                          |                             |                             |
| Baseline                                                                                                  | 90.9                     | 90.8                        | 90.5                        |
| Change from Baseline                                                                                      | -0.7                     | -1.0                        | -1.0                        |
| % Markedly Abnormal Low                                                                                   | 0.0%                     | 0.0%                        | 0.0%                        |
| % Markedly Abnormal High                                                                                  | 0.0%                     | 0.9%                        | 0.4%                        |
| <b>Insulin (μIU/mL)</b>                                                                                   |                          |                             |                             |
| Baseline                                                                                                  | 9.6                      | 9.7                         | 9.8                         |
| Change from Baseline                                                                                      | -0.1                     | 1.0                         | 0.4                         |
| % Markedly Abnormal High                                                                                  | 4.0%                     | 6.6%                        | 5.1%                        |
| <b>Alkaline Phosphatase (U/L)</b>                                                                         |                          |                             |                             |
| Baseline                                                                                                  | 88.4                     | 88.6                        | 89.4                        |
| Change from Baseline                                                                                      | -3.5                     | -3.7                        | -4.9                        |
| % Markedly Abnormal High                                                                                  | 0.4%                     | 0.0%                        | 0.0%                        |
| <b>Alanine Aminotransferase (SGPT) (U/L)</b>                                                              |                          |                             |                             |
| Baseline                                                                                                  | 23.2                     | 22.7                        | 24.0                        |
| Change from Baseline                                                                                      | 0.0                      | -0.1                        | -1.1                        |
| % Markedly Abnormal High                                                                                  | 1.2%                     | 0.4%                        | 0.0%                        |
| <b>Aspartate Aminotransferase (SGOT) (U/L)</b>                                                            |                          |                             |                             |
| Baseline                                                                                                  | 22.9                     | 22.7                        | 23.2                        |
| Change from Baseline                                                                                      | 0.2                      | 0.5                         | 0.3                         |
| % Markedly Abnormal High                                                                                  | 0.0%                     | 0.0%                        | 0.0%                        |
| <b>Bilirubin (mg/dL)</b>                                                                                  |                          |                             |                             |
| Baseline                                                                                                  | 0.53                     | 0.52                        | 0.57                        |
| Change from Baseline                                                                                      | -0.02                    | -0.01                       | -0.03                       |
| % Markedly Abnormal High                                                                                  | 0.0%                     | 0.0%                        | 0.0%                        |
| <b>Hematocrit (%)</b>                                                                                     |                          |                             |                             |
| Baseline                                                                                                  | 41.09                    | 41.26                       | 41.20                       |
| Change from Baseline                                                                                      | -0.56                    | -0.31                       | -0.34                       |
| % Markedly Abnormal Low                                                                                   | 0.0%                     | 0.0%                        | 0.0%                        |
| <b>Activated Partial Thromboplastin Time (sec)</b>                                                        |                          |                             |                             |
| Baseline                                                                                                  | 30.78                    | 30.50                       | 30.93                       |
| Change from Baseline                                                                                      | 1.35                     | 0.69                        | 1.08                        |
| % Markedly Abnormal Low                                                                                   | 0.0%                     | 0.4%                        | 1.3%                        |
| % Markedly Abnormal High                                                                                  | 4.5%                     | 1.8%                        | 3.4%                        |
| <b>Fibrinogen (mg/dL)</b>                                                                                 |                          |                             |                             |
| Baseline                                                                                                  | 407.9                    | 395.1                       | 405.2                       |
| Change from Baseline                                                                                      | 9.7                      | 17.9                        | 15.2                        |
| % Markedly Abnormal Low                                                                                   | 0.0%                     | 0.0%                        | 0.0%                        |
| % Markedly Abnormal High                                                                                  | 3.7%                     | 1.8%                        | 3.0%                        |
| <b>Prothrombin Time (sec)</b>                                                                             |                          |                             |                             |
| Baseline                                                                                                  | 11.55                    | 11.60                       | 11.57                       |
| Change from Baseline                                                                                      | 0.16                     | 0.14                        | 0.15                        |
| % Markedly Abnormal Low                                                                                   | 0.0%                     | 0.0%                        | 0.0%                        |
| % Markedly Abnormal High                                                                                  | 2.9%                     | 0.0%                        | 1.3%                        |

See Web Table 2 for reference ranges and markedly abnormal criteria.

Baseline contains all patients with baseline values

Change from Baseline contains all patients with baseline and Week 52 values

Markedly Abnormal includes all post-baseline visits except for follow-up visits.

**Web Table 2. Reference Ranges and Markedly Abnormal Criteria for blood laboratory parameters**

| Laboratory Test (Units)                     | Reference Range                                          | Markedly Abnormal Criteria <sup>a</sup> |                |
|---------------------------------------------|----------------------------------------------------------|-----------------------------------------|----------------|
|                                             |                                                          | Limits                                  | Percent Change |
| Total Cholesterol (mg/dL)                   | 130-200                                                  | > 280 mg/dL                             | > 30% ↑        |
| HDL-Cholesterol (mg/dL)                     | 40-80                                                    | < 34 mg/dL                              | > 30% ↓        |
| LDL-Cholesterol (mg/dL)                     | 0-130                                                    | > 160 mg/dL                             | > 30% ↑        |
| Triglycerides (mg/dL)                       | 45-250                                                   | > 250 mg/dL                             | > 30% ↑        |
| Glucose <sup>b</sup> (mg/dL)                | Fasting (Age ≤ 65): 68-118<br>Fasting (Age ≥ 66): 82-115 | > 140 mg/dL<br>< 50 mg/dL               | > 15% ↑/↓      |
| Insulin (μIU/mL)                            | 6-27                                                     | > 25 μIU/mL                             | > 30% ↑        |
| Alkaline Phosphatase (U/L)                  | 40-100                                                   | ≥ 3X ULN                                | > 20% ↑        |
| Alanine Aminotransferase (U/L)              | 6-37                                                     | ≥ 3X ULN                                | > 30% ↑        |
| Aspartate Aminotransferase (U/L)            | 10-36                                                    | ≥ 3X ULN                                | > 30% ↑        |
| Bilirubin (mg/dL)                           | 0.2-1.2                                                  | ≥ 2.0 mg/dL                             | > 50% ↑        |
| Hematocrit (%)                              | Age ≤ 65: 35.0-47.0<br>Age ≥ 66: 33.0-46.0               | ≤ 32%                                   | > 30% ↓        |
| Activated Partial Thromboplastin Time (sec) | 20.6-39.9                                                | > ULN<br>< LLN                          | > 30% ↑/↓      |
| Fibrinogen (mg/dL)                          | 184-514                                                  | < 100 mg/dL<br>> 600 mg/dL              | > 0% ↑/↓       |
| Prothrombin Time (sec)                      | 10.0-13.0                                                | > ULN<br>< LLN                          | > 30% ↑/↓      |

ULN = upper limit of normal; LLN = lower limit of normal

<sup>a</sup> A value was defined as markedly abnormal if it was outside the limits *and* in excess of the allowed percent change from baseline.

<sup>b</sup> Application of the markedly abnormal criteria was based on the fasting criteria for all samples. The criteria for non-fasting are presented only to show what was initially planned.

**Web Table 3. Serum Hormone Concentrations at Baseline and after 24 and 52 Weeks.\***

| <b>Hormone</b><br>[reference range]†              | <b>Treatment</b> |          | <b>Baseline</b>   |          |                    | <b>Week 24</b> |                    |          | <b>Week 52</b> |          |                | <b>P-Value‡</b> |
|---------------------------------------------------|------------------|----------|-------------------|----------|--------------------|----------------|--------------------|----------|----------------|----------|----------------|-----------------|
|                                                   | <b>Group</b>     | <b>N</b> | <b>Baseline</b>   | <b>N</b> | <b>Week 24</b>     | <b>N</b>       | <b>Week 24</b>     | <b>N</b> | <b>Week 52</b> | <b>N</b> | <b>Week 52</b> |                 |
| Free testosterone<br>[0.9 – 7.3 pg/mL]            | Placebo          | 275      | 1.30 [0.6, 2.3]   | 136      | 1.35 [0.7, 3.0]    | 135            | 1.50 [0.7, 2.9]    |          |                |          | <0.001         |                 |
|                                                   | 150 mcg/day      | 260      | 1.30 [0.6, 2.5]   | 136      | 4.20 [1.9, 7.8]    | 127            | 3.70 [1.9, 6.7]    |          |                |          | 0.44           |                 |
|                                                   | 300 mcg/day      | 265      | 1.20 [0.6, 2.5]   | 153      | 6.60 [3.0, 13.3]   | 137            | 6.10 [2.6, 10.4]   |          |                |          | 0.20           |                 |
| Bioavailable<br>testosterone<br>[0.8 – 8.6 ng/dL] | Placebo          | 250      | 2.06 [1.02, 3.76] | 108      | 1.84 [0.83, 3.71]  | NA             | NA                 |          |                |          | 0.05           |                 |
|                                                   | 150 mcg/day      | 238      | 1.99 [0.95, 4.07] | 107      | 5.12 [2.19, 10.16] | NA             | NA                 |          |                |          | NA             |                 |
|                                                   | 300 mcg/day      | 241      | 1.99 [0.88, 4.25] | 118      | 8.24 [2.98, 16.96] | NA             | NA                 |          |                |          | NA             |                 |
| Total testosterone<br>[12 – 50 ng/dL]             | Placebo          | 276      | 15.0 [8.0, 27.0]  | 138      | 16.0 [8.0, 26.0]   | 135            | 18.0 [10.0, 30.0]  |          |                |          | <0.001         |                 |
|                                                   | 150 mcg/day      | 264      | 16.5 [9.0, 27.0]  | 136      | 42.0 [23.0, 72.0]  | 127            | 45.0 [22.0, 78.0]  |          |                |          | 0.53           |                 |
|                                                   | 300 mcg/day      | 265      | 15.0 [8.0, 26.0]  | 155      | 67.0 [30.0, 111.0] | 137            | 66.0 [28.0, 117.0] |          |                |          | 0.34           |                 |
| Total dihydro-<br>testosterone<br>[7 – 31 ng/dL]  | Placebo          | 181      | 8.0 [3.0, 13.0]   | 124      | 7.0 [4.0, 14.0]    | 101            | 8.0 [5.0, 13.0]    |          |                |          | 0.01           |                 |
|                                                   | 150 mcg/day      | 180      | 8.0 [4.0, 13.0]   | 132      | 12.5 [7.0, 21.0]   | 91             | 14.0 [7.0, 22.0]   |          |                |          | 0.92           |                 |
|                                                   | 300 mcg/day      | 170      | 7.0 [0.0, 12.0]   | 143      | 18.0 [9.0, 28.0]   | 104            | 17.0 [9.0, 28.0]   |          |                |          | 0.32           |                 |

**Web Table 3. (Continued.)**

| <b>Hormone</b>                           | <b>Treatment</b> |          |                   |          |                   |          |                   |                 |
|------------------------------------------|------------------|----------|-------------------|----------|-------------------|----------|-------------------|-----------------|
| <b>[reference range]†</b>                | <b>Group</b>     | <b>N</b> | <b>Baseline</b>   | <b>N</b> | <b>Week 24</b>    | <b>N</b> | <b>Week 52</b>    | <b>P-Value‡</b> |
| Sex hormone binding globulin             | Placebo          | 277      | 42.0 [23.0, 74.0] | 142      | 44.0 [24.0, 79.0] | 133      | 43.0 [23.0,78.0]  | 0.42            |
| [13 - 98 nmol/L]                         | 150 mcg/day      | 266      | 46.0 [25.0, 81.0] | 140      | 47.0 [27.5, 87.5] | 128      | 43.0 [24.0, 80.0] | 0.02            |
|                                          | 300 mcg/day      | 267      | 41.0 [21.0, 75.0] | 147      | 41.0 [21.0, 73.0] | 138      | 41.0 [21.0, 75.0] | 0.004           |
| Free Estradiol                           | Placebo          | 215      | 0.07 [0.03, 0.18] | 99       | 0.10 [0.04, 0.51] | 125      | 0.07 [0.03, 0.18] | 0.82            |
| [0.2 – 1.1 pg/mL; follicular phase]      | 150 mcg/day      | 202      | 0.06 [0.03, 0.15] | 100      | 0.13 [0.05, 0.39] | 113      | 0.08 [0.03, 0.19] | <0.001          |
|                                          | 300 mcg/day      | 202      | 0.07 [0.03, 0.17] | 119      | 0.13 [0.05, 0.41] | 128      | 0.07 [0.03, 0.21] | 0.79            |
| Total Estradiol                          | Placebo          | 240      | 6.0 [3.0, 13.0]   | 99       | 8.0 [4.0, 33.0]   | 126      | 6.0 [3.0, 15.0]   | 0.78            |
| [12 – 101 pg/mL; follicular phase]       | 150 mcg/day      | 229      | 5.0 [3.0, 12.0]   | 101      | 9.0 [5.0, 23.0]   | 115      | 6.0 [3.0, 17.0]   | <0.001          |
|                                          | 300 mcg/day      | 229      | 6.0 [3.0, 14.0]   | 120      | 10.0 [5.0, 24.5]  | 131      | 6.0 [3.0, 14.0]   | 0.69            |
| Estrone                                  | Placebo          | 235      | 20.0 [11.0, 38.0] | 80       | 20.0 [13.0, 47.0] | 129      | 23.0 [14.0, 45.0] | 0.007           |
| [15 - 150 pg/mL; early follicular phase] | 150 mcg/day      | 236      | 19.5 [12.0, 35.0] | 77       | 21.0 [12.0, 40.0] | 125      | 23.0 [14.0, 40.0] | <0.001          |
|                                          | 300 mcg/day      | 232      | 20.0 [10.0, 34.0] | 85       | 21.0 [11.0, 34.0] | 132      | 20.0 [12.0, 38.0] | <0.001          |

\* Values are medians [10<sup>th</sup>, 90<sup>th</sup> percentile ranges]. Hormone values are summarized for patients who had blood samples collected within 5 days of the last patch application date before the scheduled study visit.

† Reference ranges generated at Quest Diagnostics using data from premenopausal women (18-49 years of age).

‡ P-values based on repeated measures ANOVA with a linear time trend using log-transformed data. Only post baseline visits are included for free, total, and bioavailable testosterone and total dihydrotestosterone for the two active treatment groups. Note that serum free and total testosterone and SHBG concentrations after 12 weeks are not shown in the table but are included in the analyses.
